# Supplementary material for: Rational design of a ratiometric fluorescent aptasensor for patulin in traditional Chinese medicine through the studies of the interaction mechanism between its DNA aptamer and the target molecule
Source: Royal Society of Chemistry journal article supplement (doi:10.1039/d3an00923h), 2023-01-01
Supplement: d3an00923h7.pdf [file d3an00923h7.pdf]

Supplementary Information

**Rational design of ratiometric fluorescent aptasensor for patulin in traditional Chinese medicine through the studies of interaction mechanism between DNA aptamer and target molecule†**

Yumeng Liao,<sup>a,1</sup> Nan Zhang,<sup>a,1</sup> Danni Chai,<sup>a</sup> Boshi Liu,<sup>\*a,b,c</sup> Jingrong Li,<sup>a</sup> Yuting Fang,<sup>a</sup> Di Zhang,<sup>a,b,c</sup> Rui Liu,<sup>a,b,c</sup> Zheng Li<sup>\*a,b,c</sup>

<sup>a</sup> College of Pharmaceutical Engineering of Traditional Chinese Medicine, Tianjin University of Traditional Chinese Medicine, Tianjin 301617, China

<sup>b</sup> State Key Laboratory of Component-based Chinese Medicine, Tianjin University of Traditional Chinese Medicine, Tianjin 301617, China

<sup>c</sup> Haihe Laboratory of Modern Chinese Medicine, Tianjin 301617, China

<sup>†</sup> These authors contributed equally to this work.

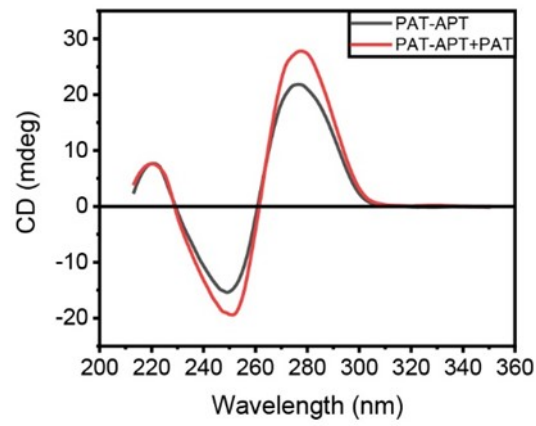

**Fig. S1.** CD Spectra of PAT-APT before and after binding with PAT.

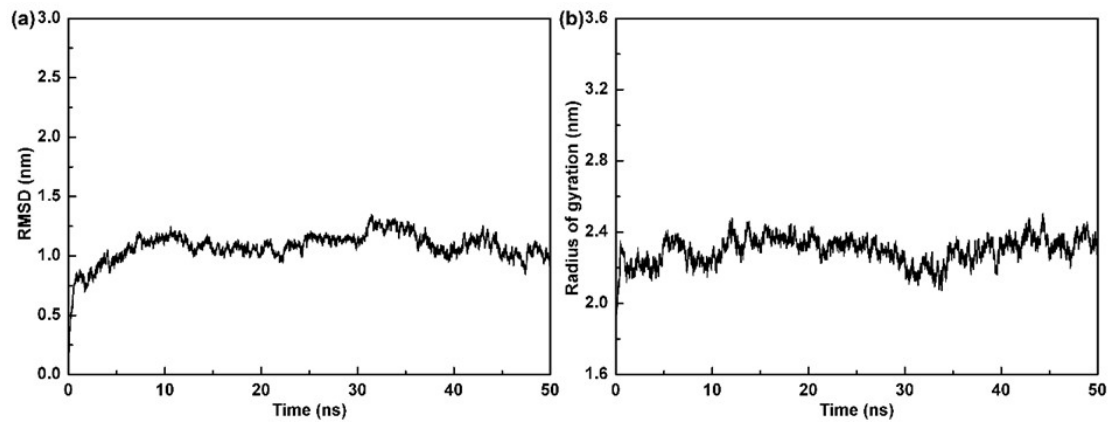

**Fig. S2.** The RMSD value (a) and Rg value(b) of PAT-APT in the system as the simulation time change

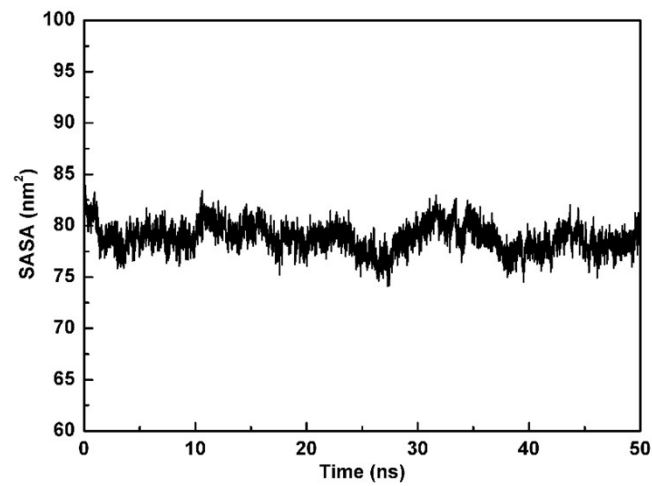

**Fig. S3.** The SASA of PAT-APT system as the simulation time change

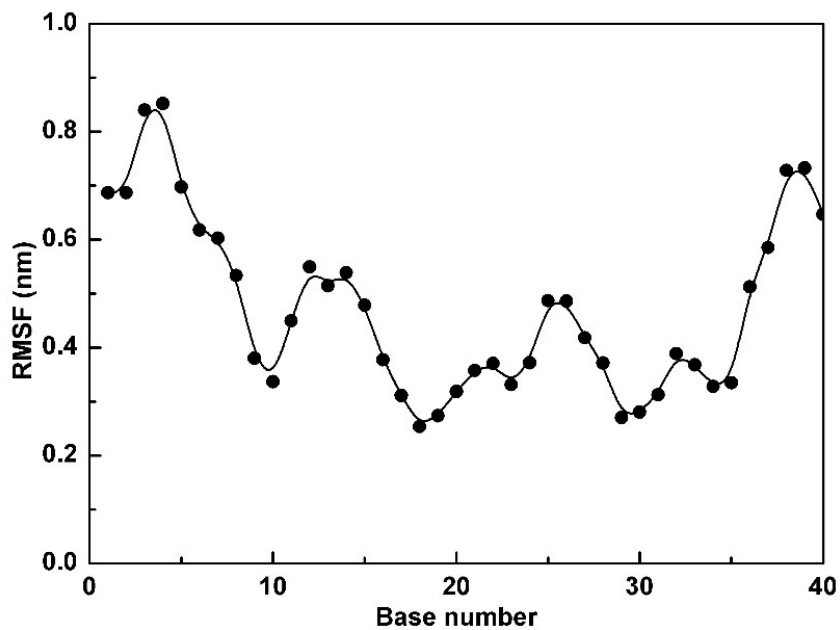

Fig. S4. RMSF distribution of the PAT-APT system

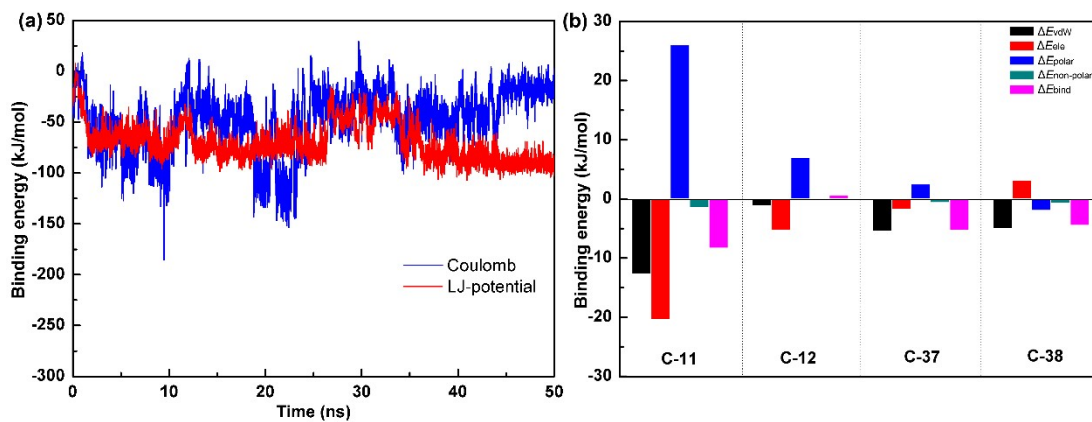

Fig. S5. Binding energy of PAT and aptamer PAT-APT. (a) the comparing of LJ potential and Coulombic force; (b) contribution of the bases in aptamer to binding energy.

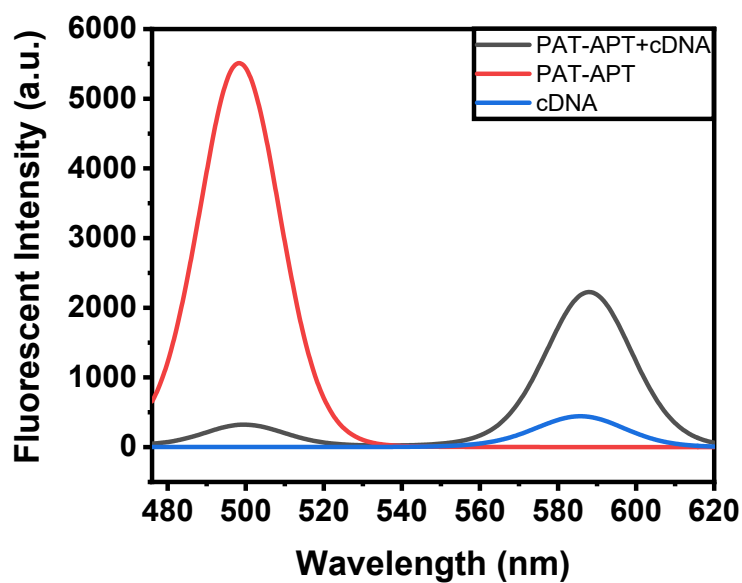

Fig. S6. Fluorescence characterization of PAT-APT, cDNA and FRET detection system

Tab. S1 cDNA sequences designed for the optimization of the length

| cDNAs     | Sequence (from 5' to 3') |
|-----------|--------------------------|
| L6-PAT-C  | CGGGCC-ROX               |
| L8-PAT-C  | GGCGGGCC-ROX             |
| L10-PAT-C | TTGGCGGGCC-ROX           |
| L12-PAT-C | GGTTGGCGGGCC-ROX         |
| L15-PAT-C | GCGGGTTGGCGGGCC-ROX      |

Tab. S2 Optimization of hybridization position in cDNA combination

| cDNAs     | Sequence (from 5' to 3') |
|-----------|--------------------------|
| PL-PAT-C  | TTGGCGGGCC-ROX           |
| PM1-PAT-C | ATGATGCGGG-ROX           |
| PM2-PAT-C | ATCAGTGTAG-ROX           |
| PR-PAT-C  | AAGGTAAAAT-ROX           |
