# Supplementary figures and images for: Rational design of a ratiometric fluorescent aptasensor for patulin in traditional Chinese medicine through the studies of the interaction mechanism between its DNA aptamer and the target molecule
Source: Royal Society of Chemistry journal article supplement (doi:10.1039/d3an00923h), 2023-01-01

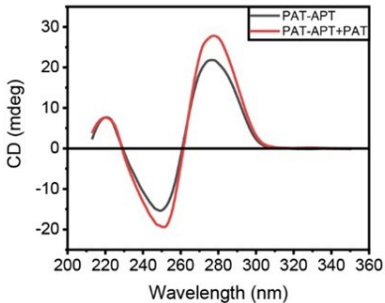

Supplement: d3an00923h1.pdf [file d3an00923h1.pdf]

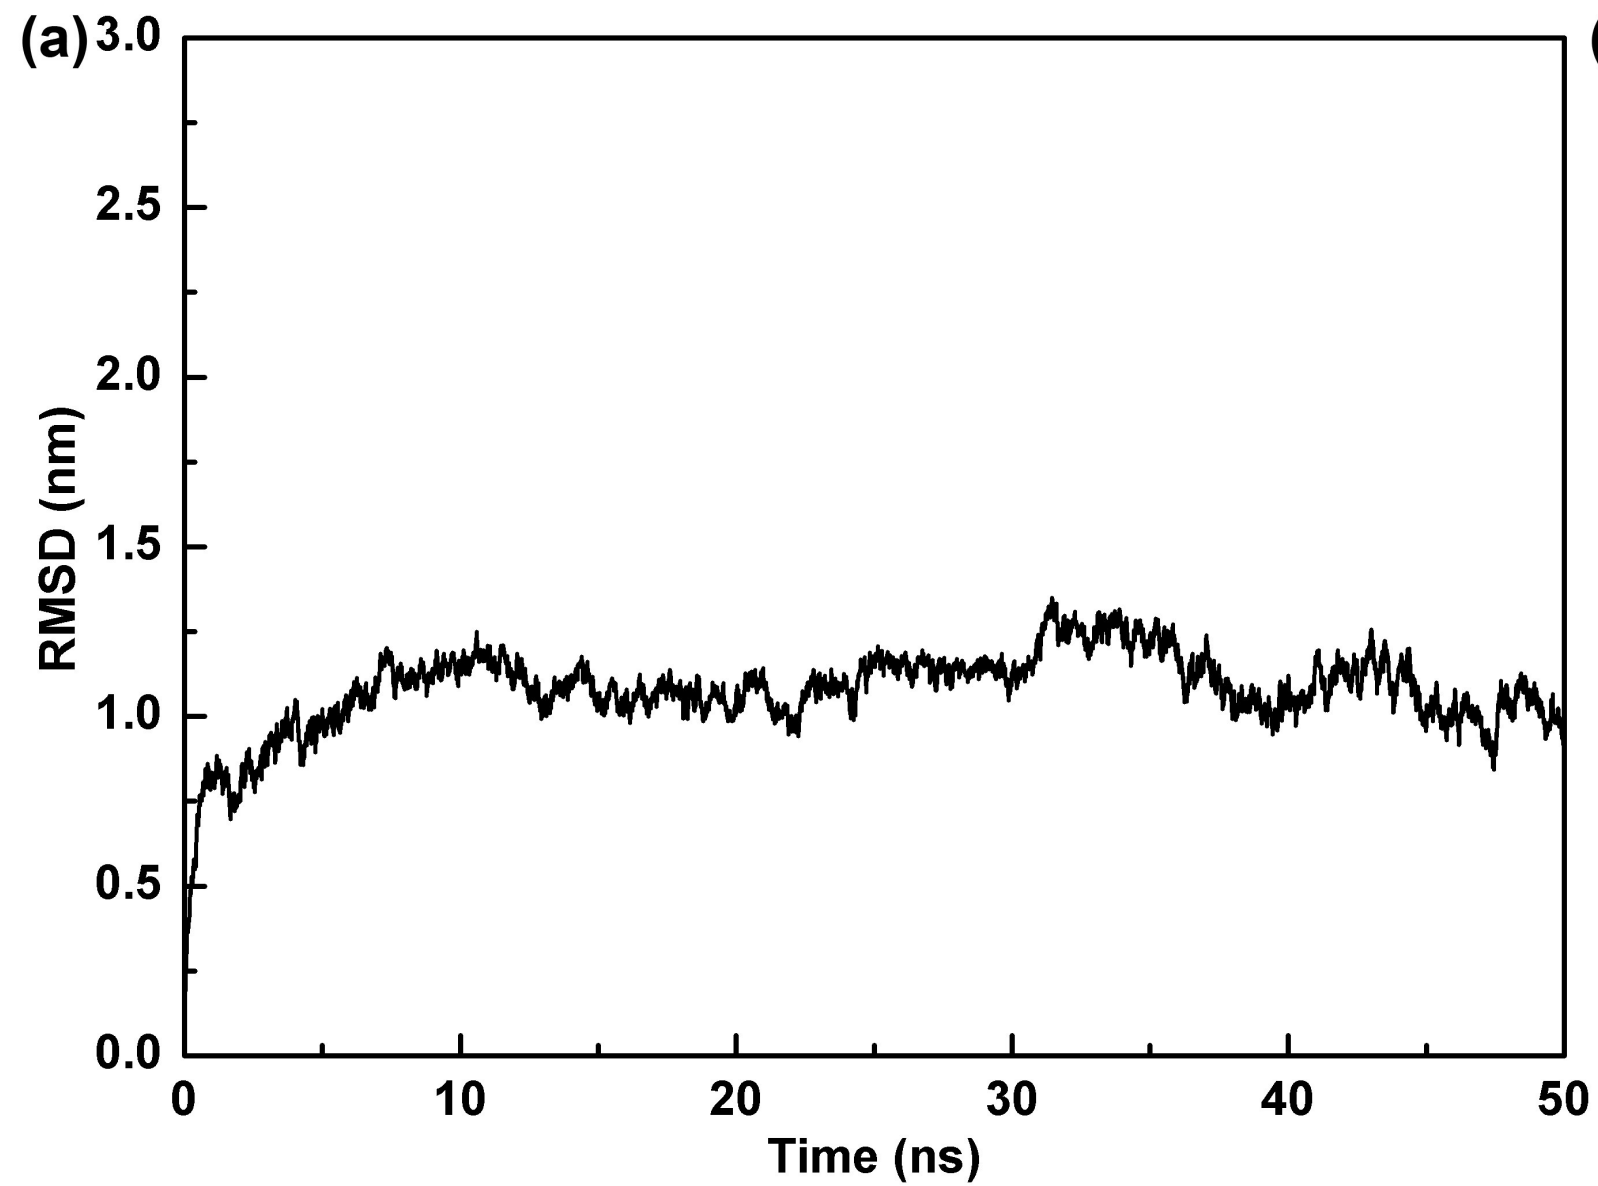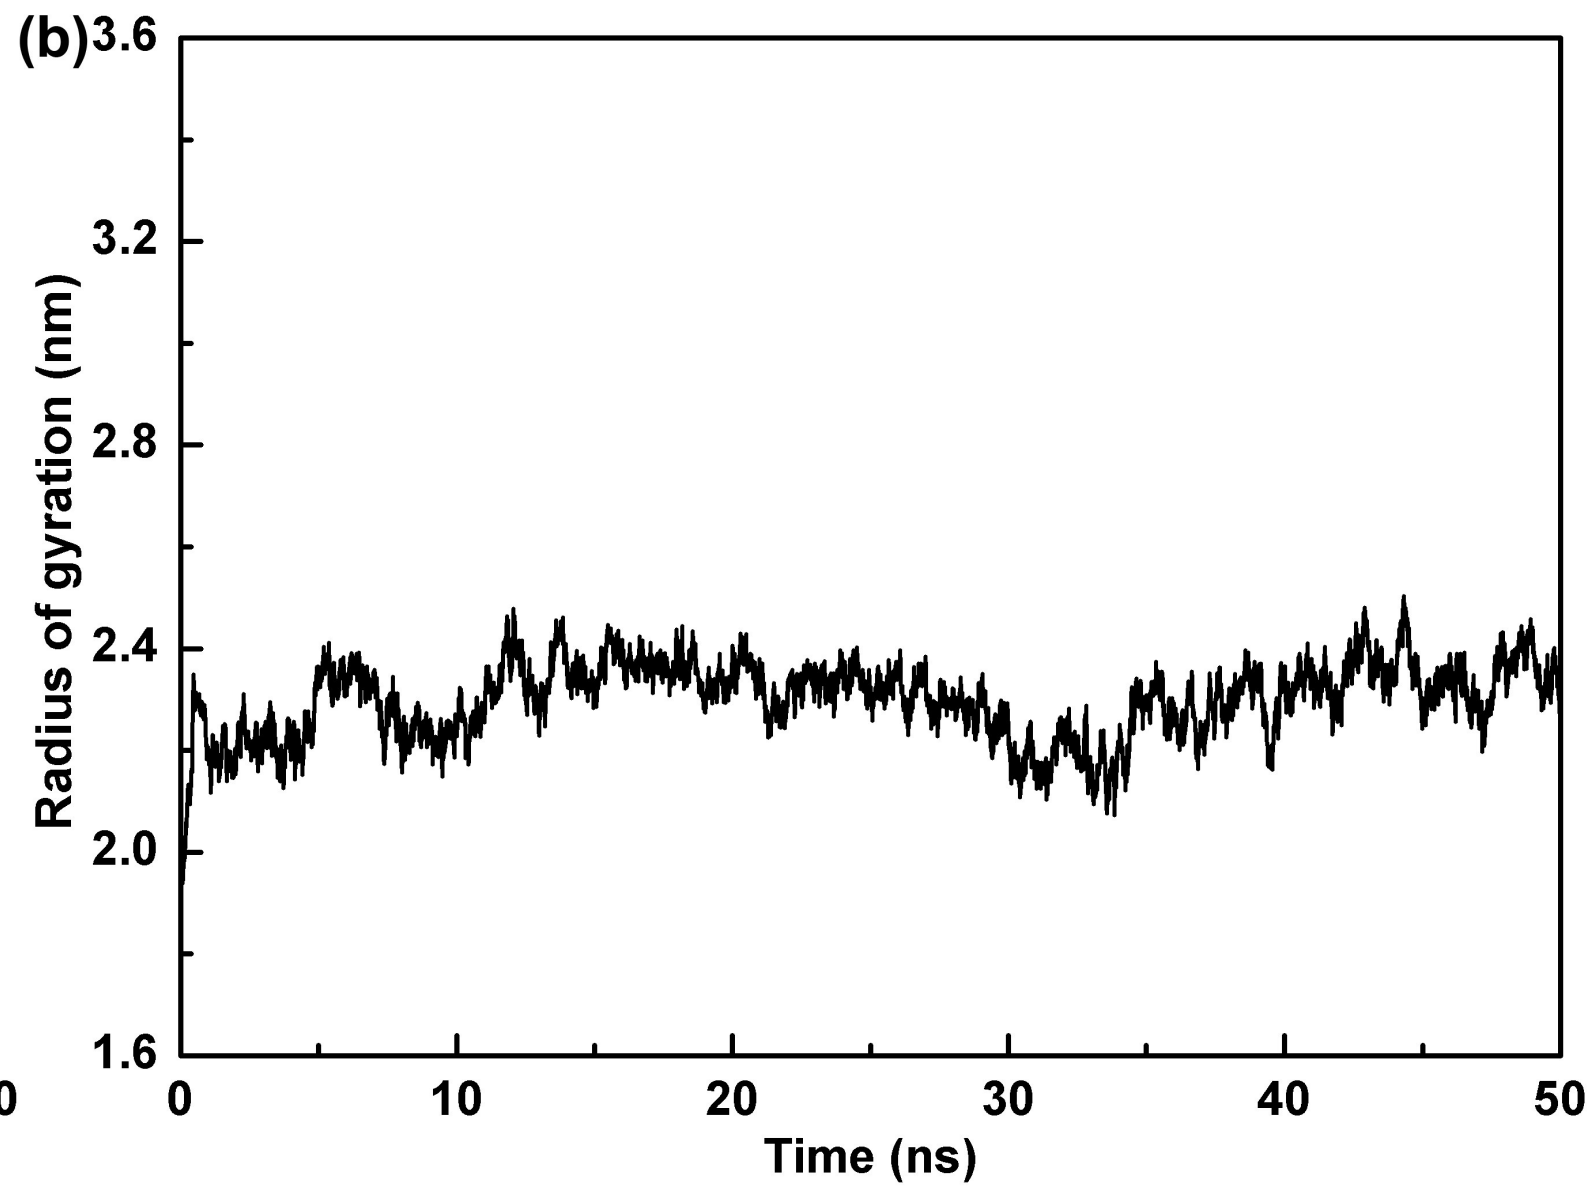

Supplement: d3an00923h2.pdf [file d3an00923h2.pdf]

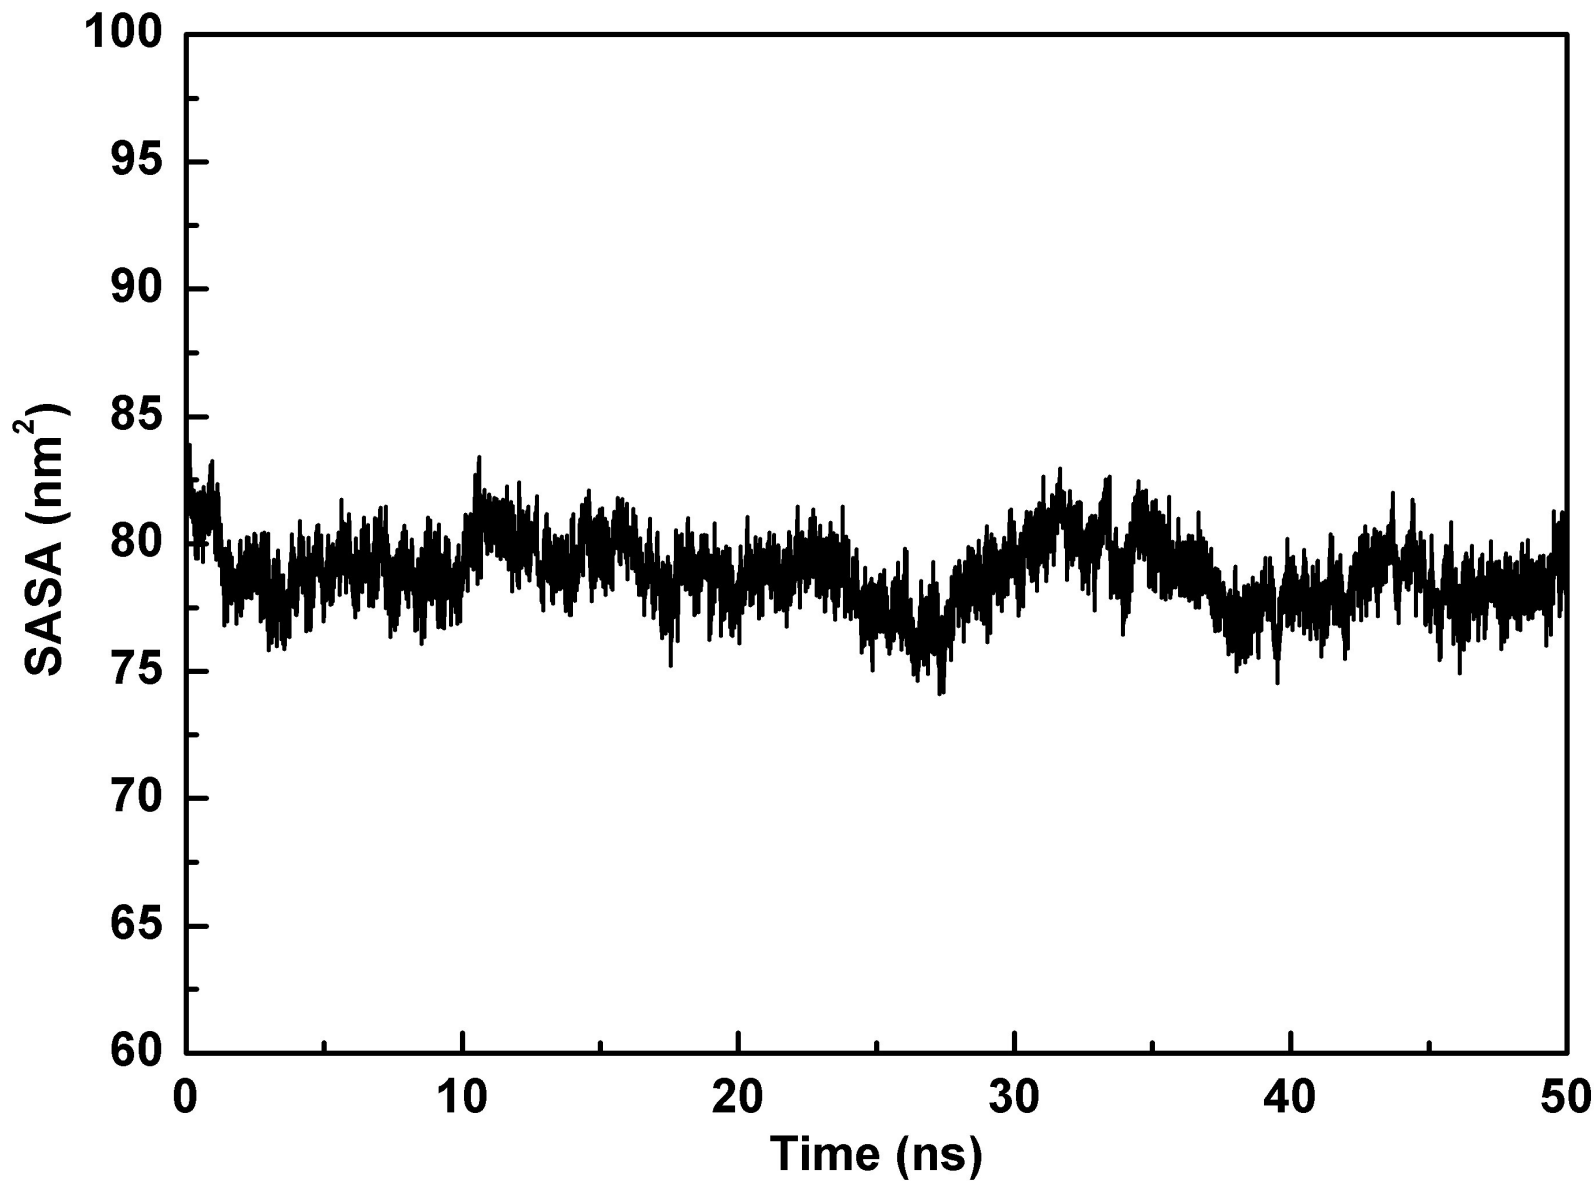

Supplement: d3an00923h3.pdf [file d3an00923h3.pdf]

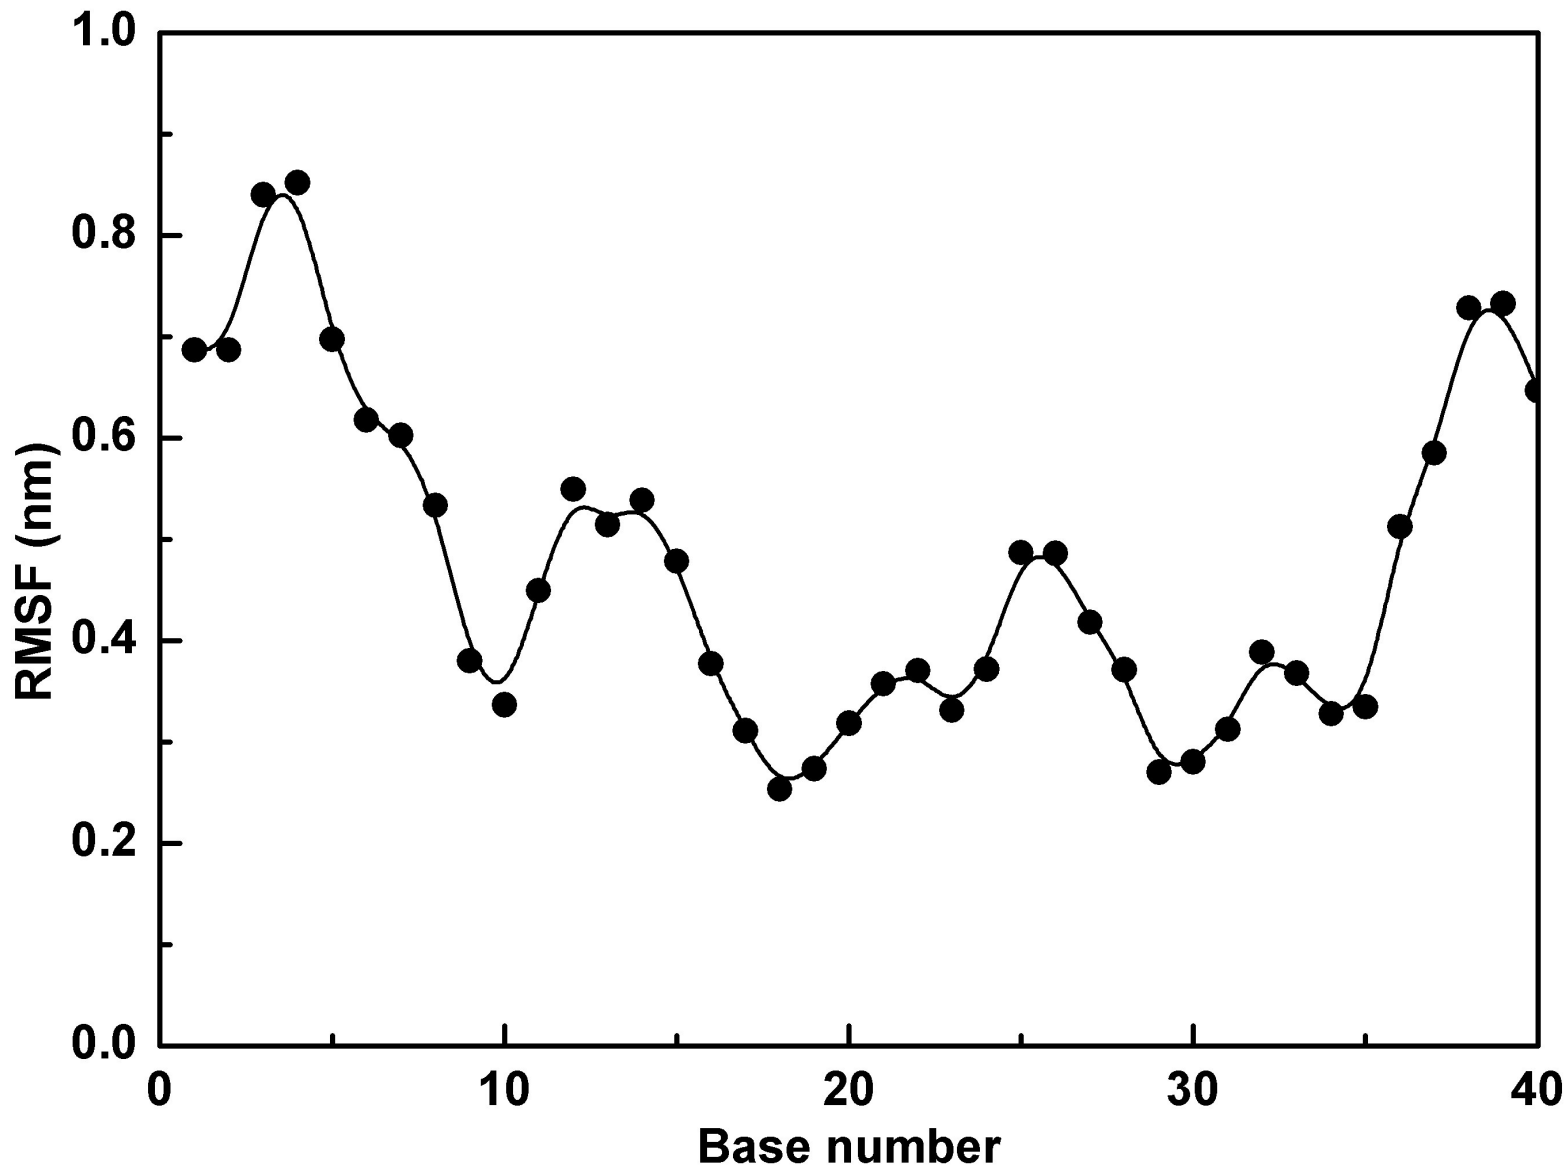

Supplement: d3an00923h4.pdf [file d3an00923h4.pdf]

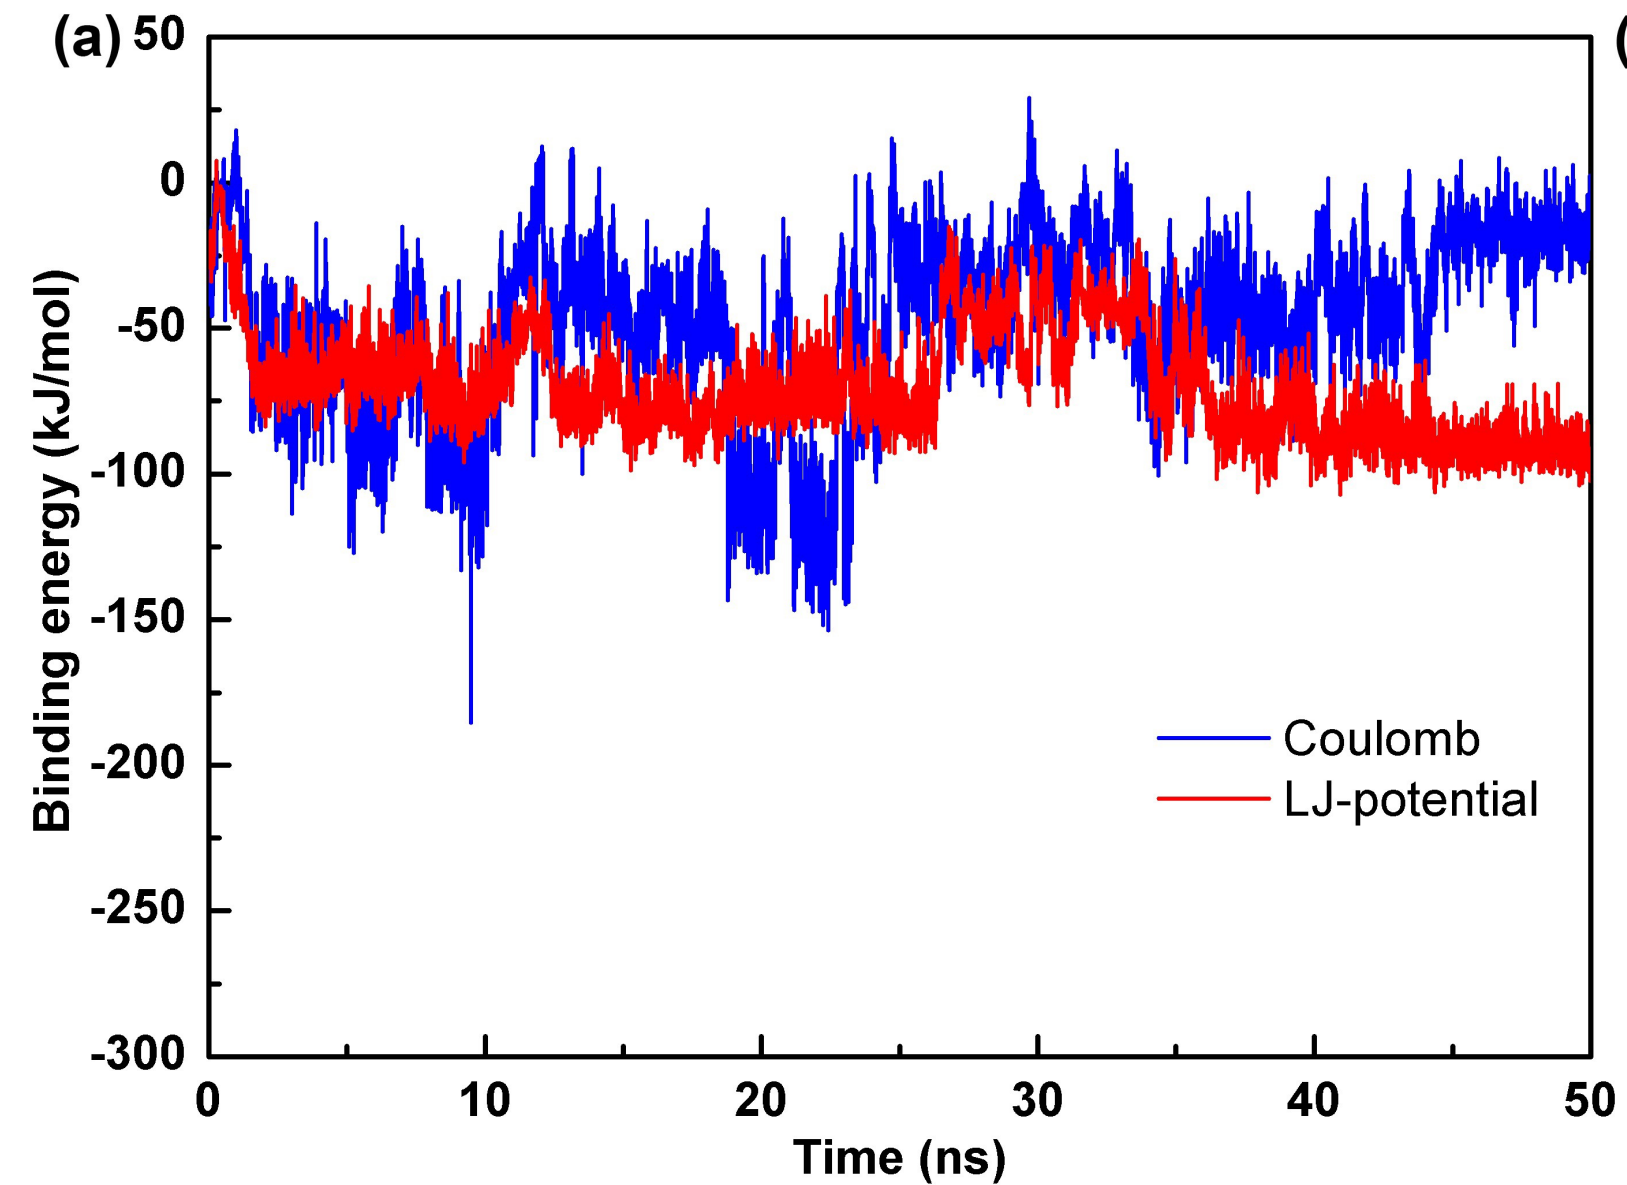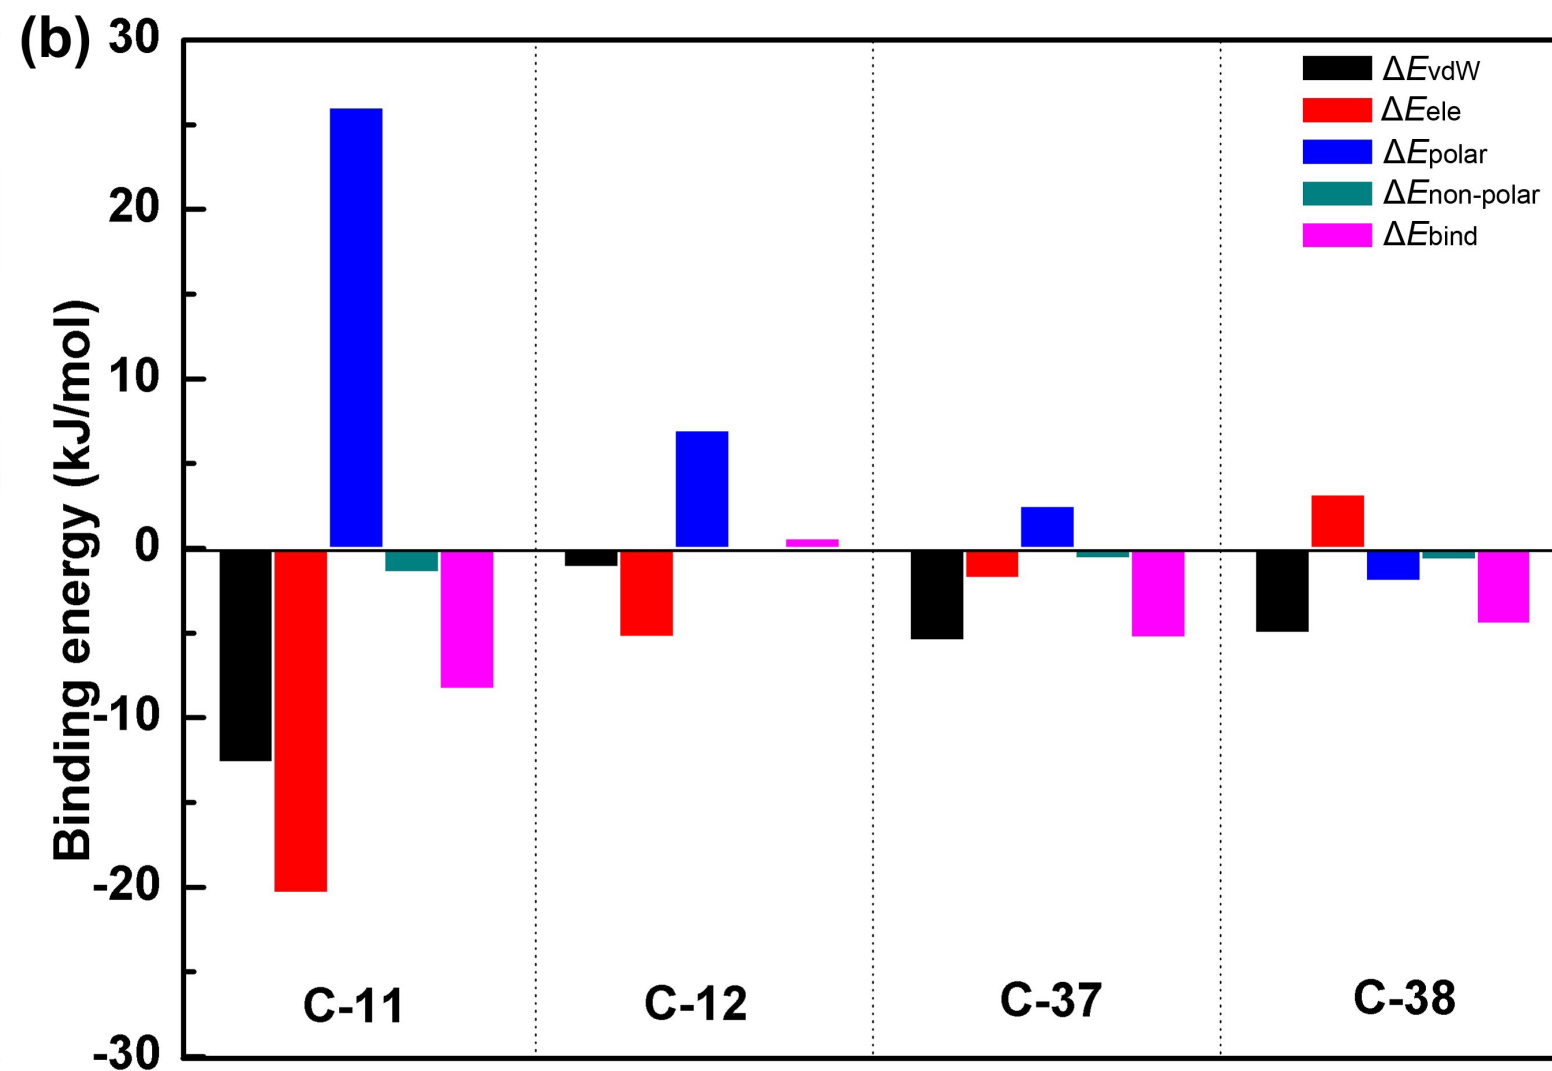

Supplement: d3an00923h5.pdf [file d3an00923h5.pdf]

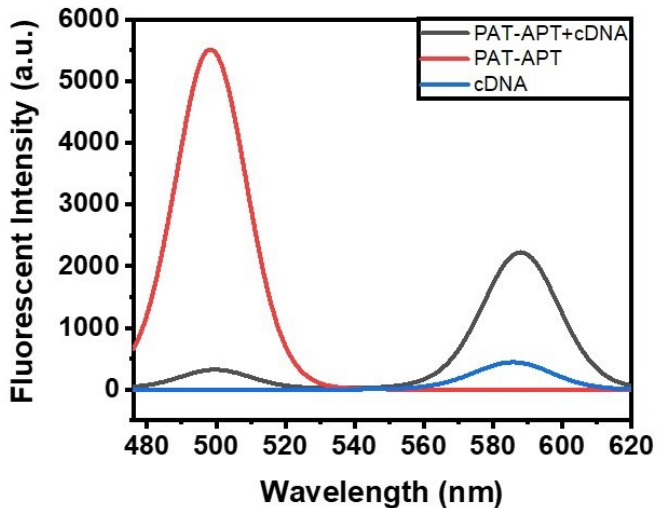

Supplement: d3an00923h6.pdf [file d3an00923h6.pdf]
